# Supplementary material
Source: PubMed Central journal article supplement (PMC8451943)
Supplement: develop-148-199684-s1.pdf [file develop-148-199684-s1.pdf]

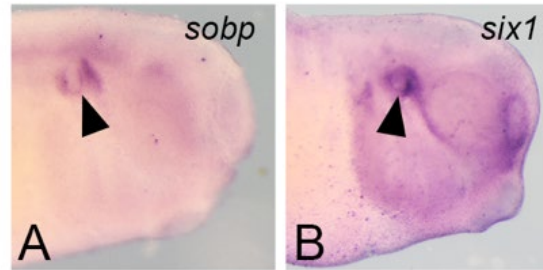

**Fig. S1. In situ hybridization for *sobp* and *six1* at larval stages.** Whole-mount view of embryos sectioned in Fig. 1C (*sobp*) and D (*six1*) showing expression in the otic vesicle (arrowheads)

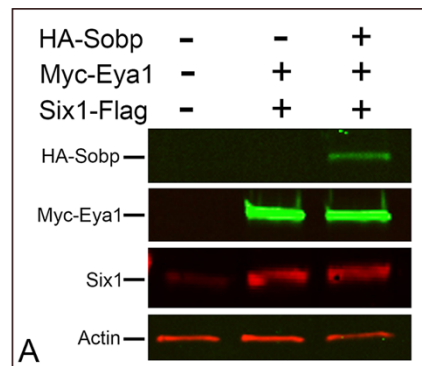

**Fig. S2. Control multiplex fluorescence Western blot for luciferase assays.**

Constructs for HA-Sobp, Myc-Eya1 and Six1-Flag are properly expressed in HEK293T cells in different combinations tested in luciferase assays. Actin is used as loading control.

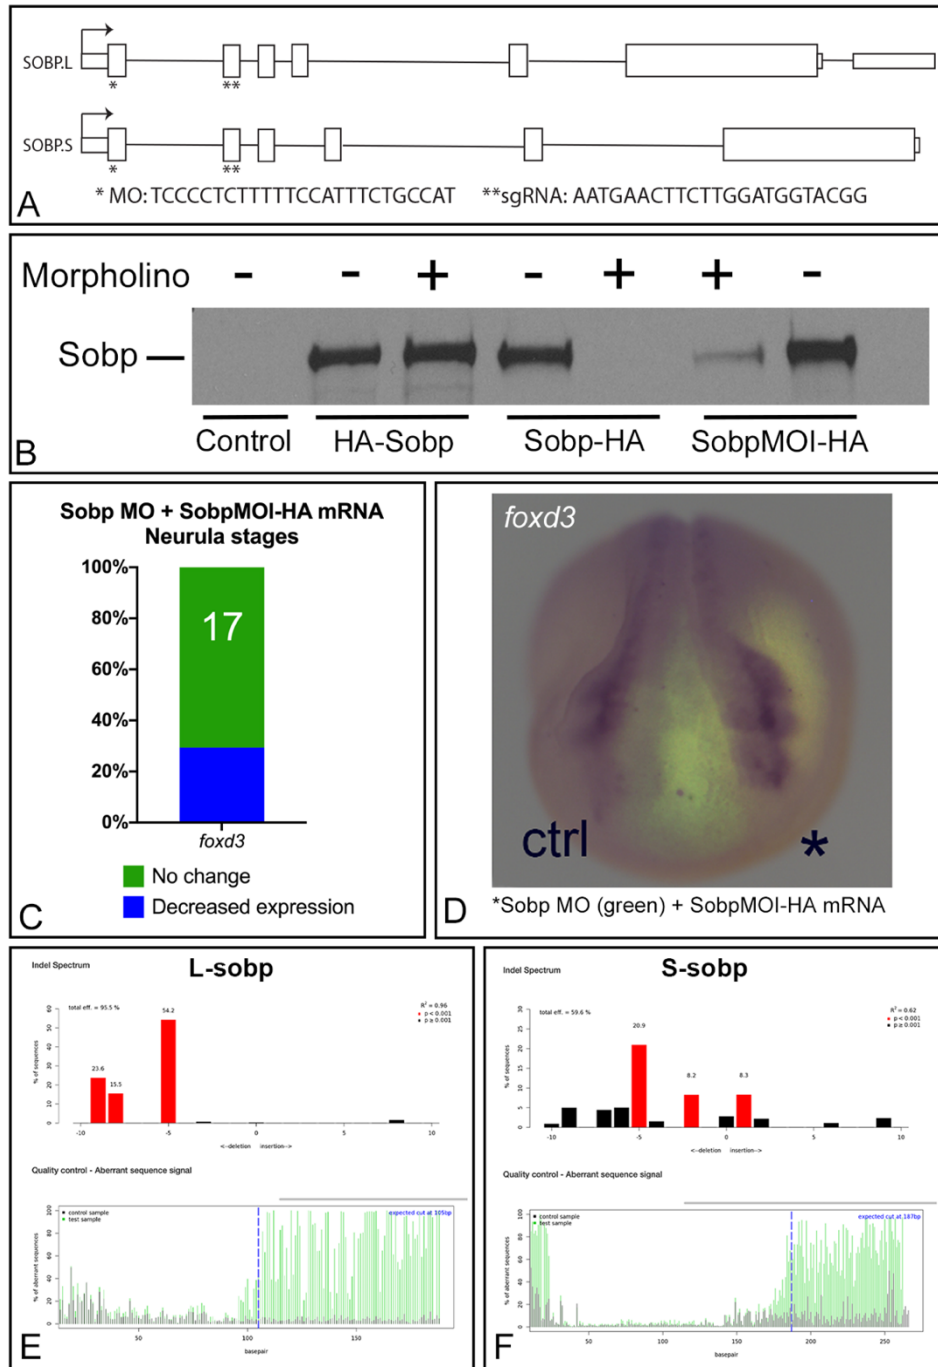

**Fig. S3. Control experiments for *in vivo* studies using a translation-blocking antisense morpholino oligonucleotide (MO) against Sobp or F0 analysis after CRISPR/Cas9-mediated genome editing. A.** Schematic representation of exons and introns in *Xenopus laevis* Sobp.L and Sobp.S genes. The MO binds at the ATG start site for both L- and S-homeologs. The sgRNA targets the L- and S-homeologs in the

second exon. **B.** Western blot detection of the HA tag showing the ability of the MO to block endogenous *sobp* translation (represented by Sobp-HA). The HA-*sobp* transcript is expected to avoid translation blockage because the 5'HA tag prevents MO binding at the translational start site. Translation of *sobp*-HA is expected to be blocked in the presence of the MO because the 3'HA tag does not interfere with MO binding. *sobpMOI*-HA is translated in the presence of MO because it has a deletion of the third codon in the *sobp* ORF (and a 3'HA tag) making it insensitive to a translation-blocking MO. **C.** Graph showing decrease in the frequency of *foxd3* reduction (29.4%) after partial rescue with unilateral injection of MO plus *sobpMOI*-HA mRNA (compare to 90.2% reduction in MO-only embryos). **D.** An embryo in which *foxd3* expression on the MO+*sobpMOI*-HA side (\*) is similar to control side. **E-F.** Calculation of insertion/deletion frequencies with the TIDE software package in an injected embryo after CRISPR/Cas9 editing showing that sgRNA targets both homeologs at the predicted site.

**Table S1. Summary of gene expression changes analyzed at neural plate stages**

| Gene           | Sobp MO                                              | Sobp CRISPR                                          | Sobp mRNA                                                      | p.R651X mRNA                                                                 |
|----------------|------------------------------------------------------|------------------------------------------------------|----------------------------------------------------------------|------------------------------------------------------------------------------|
| <i>sox2</i>    | qPCR: no significant change<br>ISH: broader, fainter | qPCR: no significant change<br>ISH: broader, fainter | qPCR: no significant change<br>ISH: no change in 67.5%         | qPCR: no significant change<br>ISH: no change in 71.4%*                      |
| <i>foxd3</i>   | qPCR: decrease<br>ISH: decrease                      | qPCR: decrease<br>ISH: decrease                      | qPCR: decrease<br>ISH: decrease in 39%;<br>increase in 39%     | qPCR: no significant change*<br>ISH: decrease in 47.4%;<br>increase in 7.9%* |
| <i>six1</i>    | qPCR: decrease<br>ISH: decrease                      | qPCR: decrease<br>ISH: decrease                      | qPCR: decrease<br>ISH: decrease in 86.9%                       | qPCR: decrease<br>ISH: decrease in 95.0%                                     |
| <i>krt12.4</i> | qPCR: no significant change<br>ISH: decrease         | qPCR: no significant change<br>ISH: decrease         | qPCR: increase<br>ISH: no change in 54.2%;<br>ectopic in 33.3% | qPCR: increase<br>ISH: no change in 77.3%;<br>ectopic in 19.7%*              |

\* Significantly different compared to full-length sobp mRNA

**Table S2. Summary of gene expression changes at larval stages**

| Gene        | Sobp CRISPR                                                                  | Sobp mRNA                                                                    | p.R651x mRNA                                                                   |
|-------------|------------------------------------------------------------------------------|------------------------------------------------------------------------------|--------------------------------------------------------------------------------|
| <i>six1</i> | qPCR: no significant change<br>ISH: no change in 68.6%;<br>decrease in 25.7% | qPCR: no significant change<br>ISH: no change in 43.3%;<br>decrease in 50.0% | qPCR: no significant change<br>ISH: no change in 51.3%;<br>decrease in 35.9%   |
| <i>dlx5</i> | qPCR: decrease<br>ISH: decrease in 42.9%                                     | qPCR: no significant change<br>ISH: increase in 46.4%;<br>decrease in 39.3%  | qPCR: no significant change<br>ISH: no change in 42.1%;<br>decrease in 36.8% * |
| <i>pax2</i> | qPCR: decrease<br>ISH: decrease in 54.0%                                     | qPCR: increase<br>ISH: increase in 59.5%;<br>decrease in 16.2%               | qPCR: no significant change<br>ISH: no change in 56.7%;<br>increase in 30.3% * |

\* significantly different compared to full-length sobp mRNA

**Table S3. CRISPR primer and genotyping sequences**

|              | Forward               | Reverse              |
|--------------|-----------------------|----------------------|
| PCR: L-sobp  | GGATTACGTTCAACCGGGC   | CCCATCTGCATGATAGTTCC |
| PCR: S-sobp  | GTGCCTTACTTTTGCCAATCC | CTTCCACTTCAGAACAAACC |
| Sequencing L | GCATGATGAACCCATACTCC  |                      |
| Sequencing S | CACTTTCTAAAAGTCCTACT  |                      |

**Table S4. qPCR primer sequences**

|                | Forward                | Reverse                 |
|----------------|------------------------|-------------------------|
| <i>dlx5</i>    | GGAGCGTATAACAGGGTGCA   | CGTCTTTGTAACGCTGCGAG    |
| <i>foxd3</i>   | GAGGACATGTTTCGACAATGG  | CAAAGCTTTGCATCATGAGAG   |
| <i>krt12.4</i> | CACCAGAACACAGAGTAC     | CACCAGAACACAGAGTAC      |
| <i>odc</i>     | CATTGCAGAGCCTGGGAGATA  | TCCACTTTGCTCATTACCATAAC |
| <i>pax2</i>    | ATCTGCGACAATGACACGGT   | GGGTTGGATGGAATGGCTGT    |
| <i>six1</i>    | CAGGTCAGCAATTGGTTCAAG  | CAGGTCAGCAATTGGTTCAAG   |
| <i>sobp</i>    | GCCTTCAAGAATAACTGCGAAC | TTGATTTAGACACTTTGCACTGC |
| <i>sox2</i>    | TCACCTCTTCTTCCCATTCTG  | CGACATGTGCAGTCTGCTTT    |
